# Supplementary material
Source: publisher figshare collection journal article supplement (https://karger.figshare.com/ndownloader/files/23898941)
Supplement: Supplementary file 1 [file 23898941]

**Table S3.** Characteristics of patients with or without grade ≥ 3 toxicities

| **Characteristics** | **With**  **Grade ≥ 3** | **Without**  **Grade ≥ 3** | **P-value** |
| --- | --- | --- | --- |
| Age, y |  |  |  |
| < 70 | 11 | 7 | 0.7247 |
| ≥ 70 | 12 | 5 |  |
| Sex |  |  |  |
| Male | 17 | 8 | 0.7062 |
| Female | 6 | 4 |  |
| Smoking history |  |  |  |
| Yes | 15 | 9 | 0.7091 |
| No | 8 | 3 |  |
| Histology |  |  |  |
| Adenocarcinoma | 21 | 8 | 0.1511 |
| Non-adenocarcinoma | 2 | 4 |  |
| EGFR mutation |  |  |  |
| Wild type | 10 | 10 | 0.0216 |
| Mutant | 12 | 1 |  |
| Previous chemotherapy |  |  |  |
| Once | 17 | 10 | 0.6855 |
| Twice | 6 | 2 |  |

EGFR: epidermal growth factor receptor
